# Supplementary material
Source: Springer Nature journal article supplement (https://www.springermedizin.de/resource/supplementary/13256_2007_335_MOESM2_ESM.pdf/9645758)

956642 BR2 M/53y  
9090-11  
-155.00 mm

Weston General  
Philips Mx8000  
6 Nov 2003 16:39:40.4  
120kV, 250mAs  
SC 263.0 mm  
SW 5.0 mm  
ST 1.75s  
Z 1.00

R

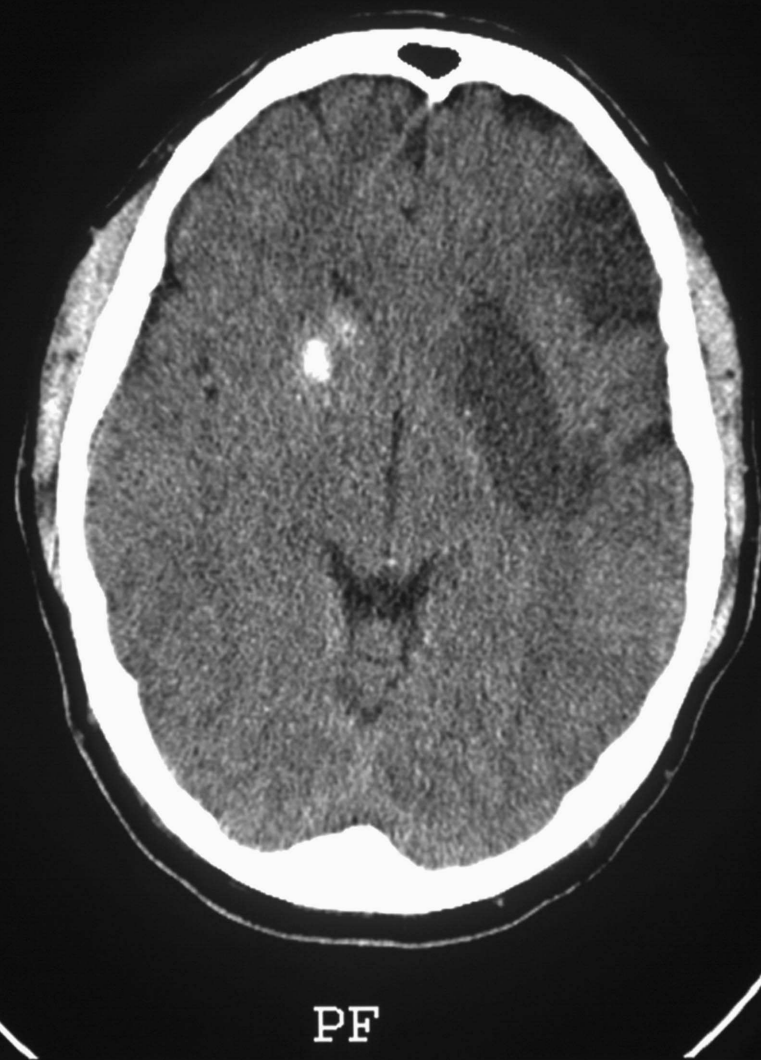

10 cm

PF

C1 35  
W1 80

Supplement: MOESM2 [file 9645758]
